# Supplementary material
Source: MDPI journal article supplement (https://www.mdpi.com/2079-9276/8/2/114)
Supplement: s1 [file s1]

# Sustainable Extraction and Characterisation of Bioactive Compounds from Horse Chestnut Seed Coats for the Development of Bio-Based Additives

Thomas Havelt <sup>1,2,\*</sup>, Sarah Brettschneider <sup>1</sup>, Xuan Tung Do <sup>1</sup>, Imke Korte <sup>2,3</sup>,  
Judith Kreyenschmidt <sup>2,3</sup> and Michaela Schmitz <sup>1,2,\*</sup>

## Supplementary Materials

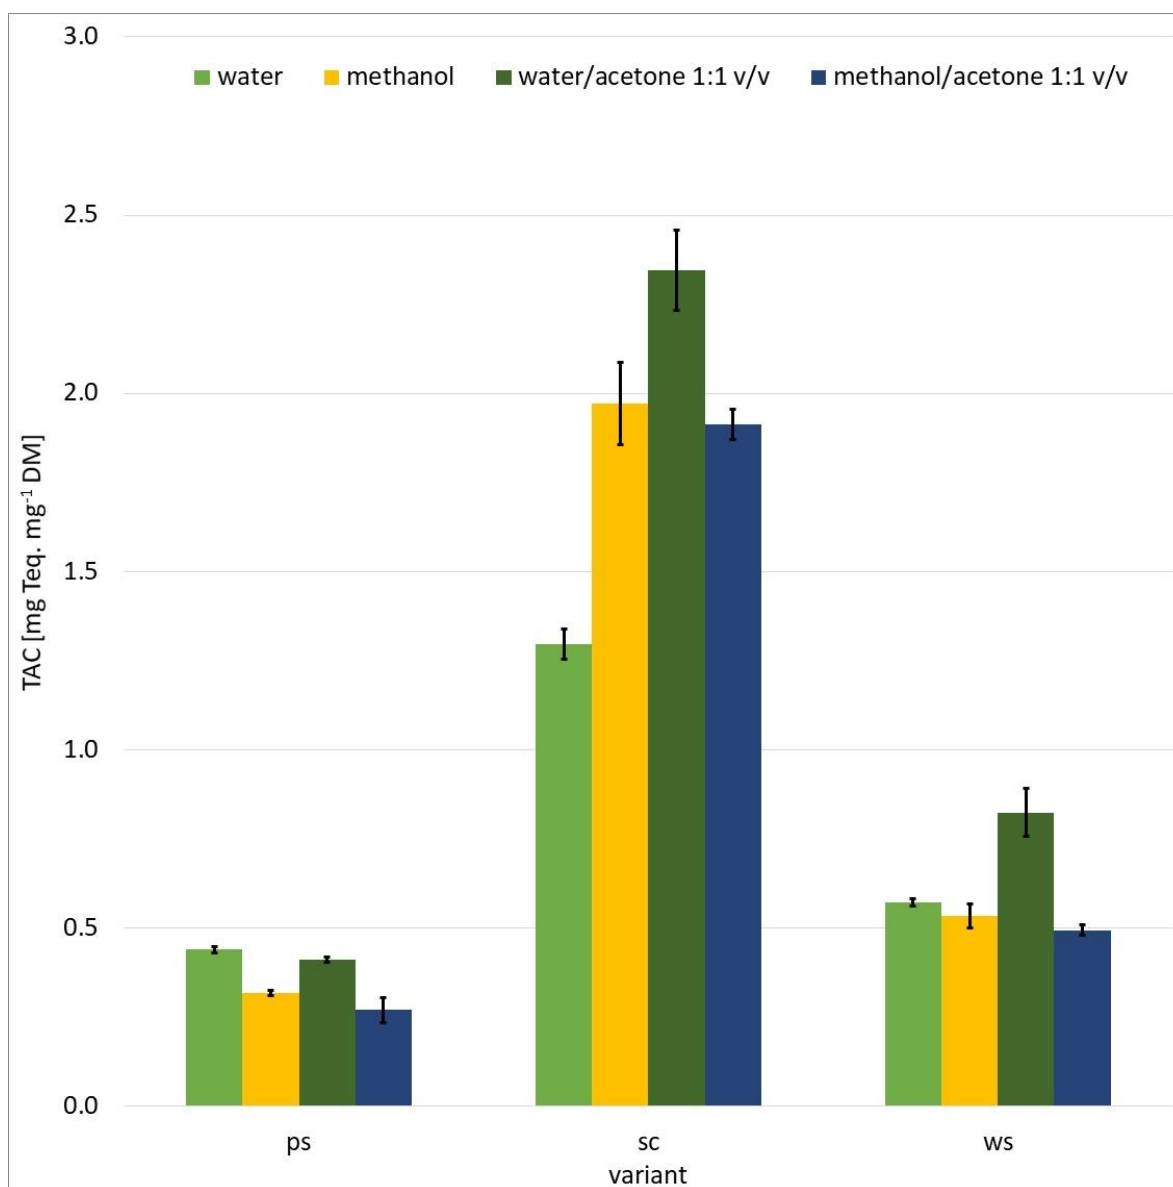

**Figure S1.** Solvent-dependent total antioxidative capacity (TAC) of peeled seeds (ps), seed coats (sc) and whole seeds (ws) from *Aesculus hippocastanum* L. extracted by grinding extraction. Measurements in triplicate, standard deviation indicated by error bars. Teq.: Trolox equivalents; DM: dried sample mass.
